# Supplementary material for: Structural Characterization of Polysaccharides from Noni (Morinda citrifolia L.) Juice and Their Preventive Effect on Oxidative Stress Activity
Source: MDPI journal article supplement (doi:10.3390/molecules30051103), 2025-02-27
Supplement: s1 [file s1]

# Structural Characterization of Polysaccharides from Noni (*Morinda citrifolia* L.) Juice and Their Preventive Effect on Oxidative Stress Activity

Bin Zhang <sup>1,\*†</sup>, Xiaoyu Wei <sup>1,†</sup>, Peiwen Du <sup>1</sup>, Huangqun Luo <sup>1</sup>, Lanfang Hu <sup>1</sup>, Liping Guan <sup>1</sup> and Guangying Chen <sup>2,\*</sup>

<sup>1</sup> School of Food and Pharmacy, Zhejiang Ocean University, Zhoushan 316000, China; x001022y@126.com (X.W.); 15935734529@163.com (P.D.); 15968598177@163.com (H.L.); 19818028379@163.com (L.H.); glp730@zjou.edu.cn (L.G.)

<sup>2</sup> Key Laboratory of Tropical Medicinal Resource Chemistry of Ministry of Education, College of Chemistry and Chemical Engineering, Hainan Normal University, Haikou 571158, China

\* Correspondence: 2022150@zjou.edu.cn (B.Z.) chgying123@163.com (G.C.)

† These authors contributed equally to this work.

**Abstract:** Polysaccharides are very promising molecules in the field of pharmacotherapy. Knowing this, the aim of this study was to extract, characterize and evaluate the action of the polysaccharide of *noni juice* in biological models of Type 2 diabetes mellitus processes. In this study, one polysaccharide, named NJSPd-1 was separated from the fermented noni fruit juice. Characterization assay showed that NJSPd-1 had the molecular weight (*M<sub>w</sub>*) of 18545 Da. NJSPd-1 consisted of galacturonic acid, galactose, rhamnose, and arabinose, with a molar ratio of 28.79:20.34:19.80:18.84 in HPGPC analysis, and the glycosidic bond mainly included  $\rightarrow 4$ )- $\alpha$ -D-GalAp-(1 $\rightarrow$ , 4)- $\beta$ -D-Glcp-(1 $\rightarrow$ ,  $\rightarrow 2$ )- $\alpha$ -L-Rhap-(1 $\rightarrow$ , and  $\rightarrow 3$ )- $\alpha$ -L-Araf-(1 $\rightarrow$ . The prevention of oxidative stress activities of NJSPd-1 was evaluated by high glucose induced oxidative stress in HepG2 cells. In vitro result showed that, NJSPd-1 influenced the down-regulation of the proteins and genes Nrf2, Keap1, HO-1, and NQO1 in HepG2 cells. The results suggest that NJSPd-1 exerted a protective effect against oxidative stress by activating the Nrf2/HO-1/NQO1 signaling pathway in HepG2 cells.

**Keywords:** *Noni juice*; Polysaccharides; Structural characterization; Oxidative stress; Signaling pathway

## List of Supplementary Material

Figure S1.  $^1\text{H}$  NMR spectrum of NJSPd-1

Figure S2.  $^{13}\text{C}$  NMR spectrum of NJSPd-1

Figure S3. HSQC spectrum of NJSPd-1

Figure S4.  $^1\text{H}$ - $^1\text{H}$  COSY spectrum of NJSPd-1

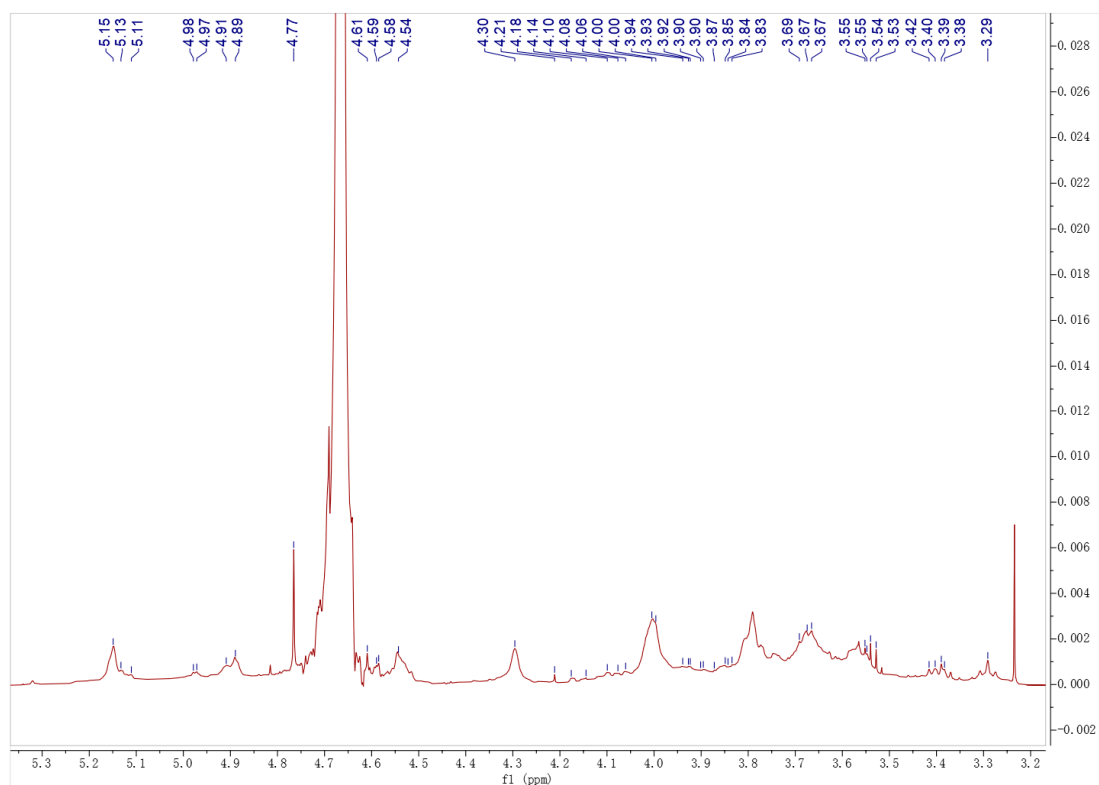

Figure S1. <sup>1</sup>H-NMR spectrum of NJSPd-1

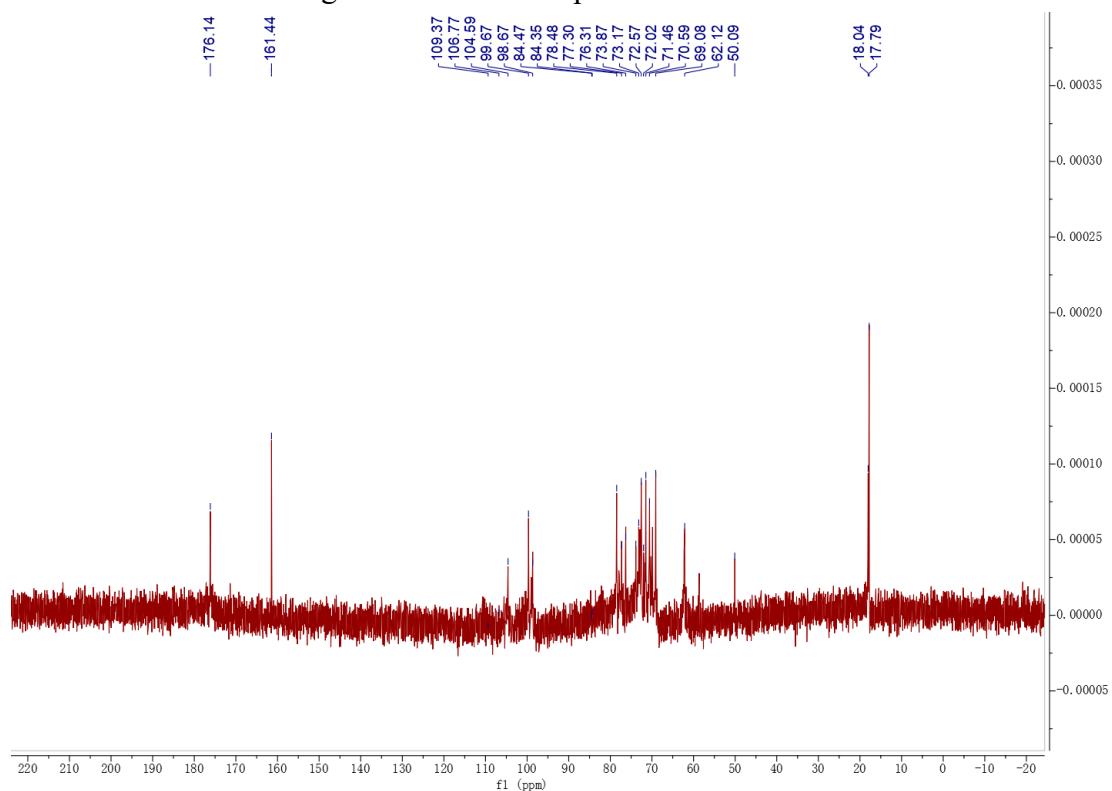

Figure S2. <sup>13</sup>C-NMR spectrum of NJSPd-1

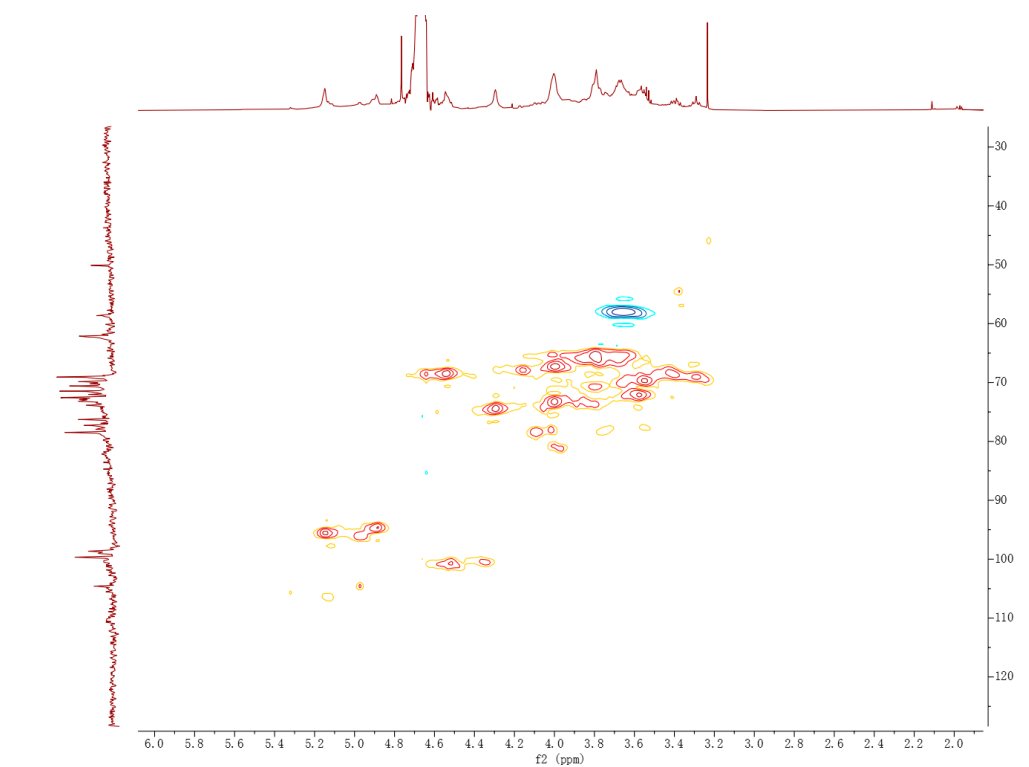

Figure S3. HSQC spectrum of NJSPd-1

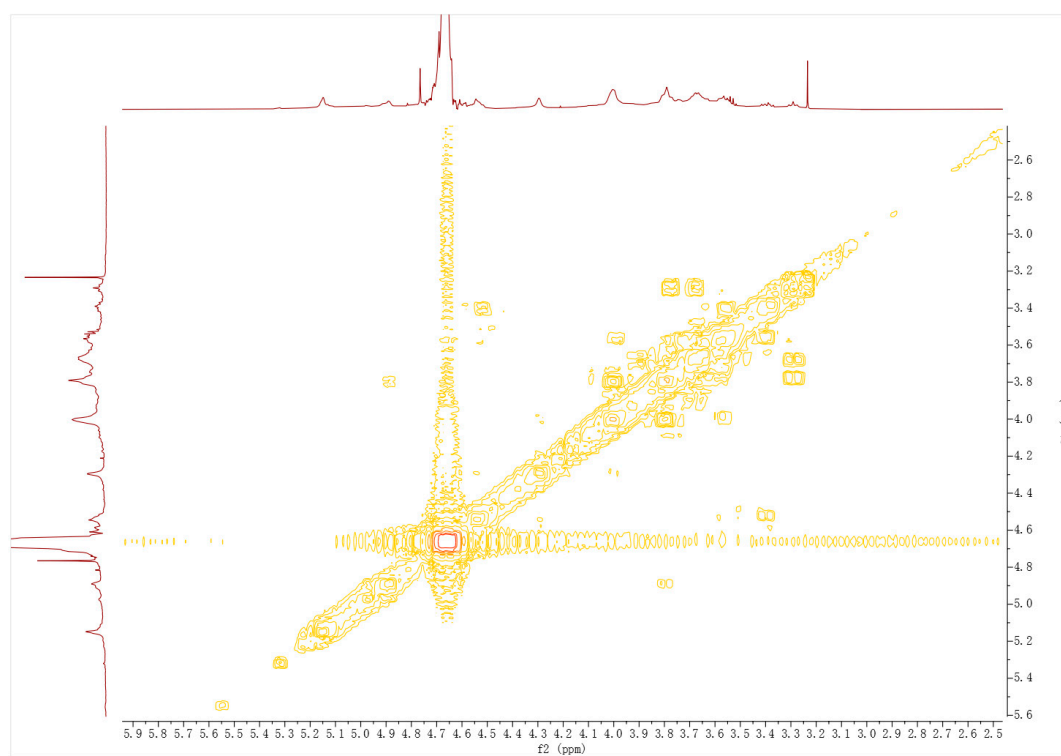

Figure S4.  $^1\text{H}$ - $^1\text{H}$  COSY spectrum of NJSPd-1
